# Supplementary material
Source: publisher figshare collection journal article supplement (https://acs.figshare.com/ndownloader/files/34633312)
Supplement: Supplementary file 1 [file 34633312]

3 **Examining the sensitivity of global CO<sub>2</sub>**  
4 **emissions to trade restrictions over multiple**  
5 **years**

6 **Mingxi Du<sup>#1,2</sup>, Qiuyu Liu<sup>#3</sup>, Graham K. MacDonald<sup>2</sup>, Yawen Liu<sup>4,5</sup>, Jintai Lin<sup>6</sup>, Qi Cui<sup>7</sup>,**  
7 **Kuishuang Feng<sup>8</sup>, Bin Chen<sup>9</sup>, Jamiu Adetayo Adeniran<sup>10</sup>, Lingyu Yang<sup>4,5</sup>, Xinbei Li<sup>4,5</sup>, Kaiyu Lyu<sup>11</sup>,**  
8 **Yu Liu<sup>4,5\*</sup>**

- 9 1. School of Public Policy and Administration, Xi'an Jiaotong University, Xi'an, 710049, China  
10 2. Department of Geography, McGill University, Montreal, H3A 0B9, Canada.  
11 3. Department of Biological Sciences, University of Quebec at Montreal, Montreal, H3C 3P8, Canada  
12 4. Institutes of Science and Development, Chinese Academy of Sciences, Beijing, 100190, China  
13 5. School of Public Policy and Management, University of Chinese Academy of Sciences, Beijing,  
14 100049, China  
15 6. Laboratory for Climate and Ocean-Atmosphere Studies, Department of Atmospheric and Oceanic  
16 Sciences, School of Physics, Peking University, Beijing, 100871, China  
17 7. School of Economics and Resource Management, Beijing Normal University, Beijing, 100875,  
18 China.  
19 8. Department of Geographical Sciences, University of Maryland, College Park, MD 20742, USA  
20 9. Fudan Tyndall Center, Department of Environmental Science & Engineering, Fudan University,  
21 Shanghai, 200438, China  
22 10. Environmental Engineering Research Laboratory, Department of Chemical Engineering, University  
23 of Ilorin, Ilorin, 240003, Nigeria  
24 11. Institute of Agricultural Economics and Development, Chinese Academy of Agricultural Sciences,  
25 Beijing, 100081, China  
26

27 **#These authors contributed equally to this work.**

28 **\*Corresponding authors: M.D. (dumingxi28@xjtu.edu.cn) or Y.L. (liuyu@casipm.ac.cn).**

## 30 **Uncertainty and limitations**

31 Several factors result in uncertainty in our analysis and findings. First, the CO<sub>2</sub> emissions considered  
32 here are focused on the source of fuel combustion for economic production. In other words, CO<sub>2</sub>  
33 emissions from activities that are not directly related to economic output, like private transport and  
34 residential activities, are not included in our study. Thus, the emissions we considered in our simulations,  
35 when summed, are lower than the actual regional and global emissions. For example, 9.9 Pg of global  
36 CO<sub>2</sub> emission were omitted in this study for the year 2014<sup>1</sup>. However, since the aim of our study was to  
37 test the impact of trade on emissions, only including emissions from economic production is sufficient  
38 to capture the signature under different trade-related scenarios. Second, our trade restrictions scenarios  
39 were designed with an additional 25% tariff, but the impacts on emission might be different with higher-  
40 level tariffs imposed. To test the robustness of our results, we added two more hypothetical trade  
41 restriction scenario with higher levels of tariff imposed: GTB-35 and GTB-50 (+35% and 50% for each  
42 region and traded product, respectively). Under these two tariff levels, even though the simulated  
43 magnitudes vary under each scenario, the relative changes for each region are robust and monotonic with  
44 the imposed tariff increasing (Supplementary Table 2 and Supplementary Figure 1). The robustness of  
45 simulated GDP changes by GTAP have been tested with a similar method in our previous study under  
46 several hypothetical scenarios with different levels of additional tariff for China and the US<sup>16</sup>. Therefore,  
47 the results of our sensitivity tests support our interpretation that changing the level of tariffs only affects  
48 the numerical magnitude of results but not the reliability of this study. Third, the emission calculation  
49 under each scenario assumes homogeneity of products sold into different markets. This assumption  
50 underlines the differences between domestic products and trade products <sup>2</sup>, especially considering the  
51 “processing trade” <sup>3</sup>. This limitation will be amplified with a higher level of aggregation. Therefore, we  
52 used the most detailed data in the GTAP database (65 production sectors) in this study to reduce this  
53 limitation and capture heterogeneity to the greatest extent possible. Besides, note that some regions with  
54 negative values of elasticity under specific scenario were not included here.

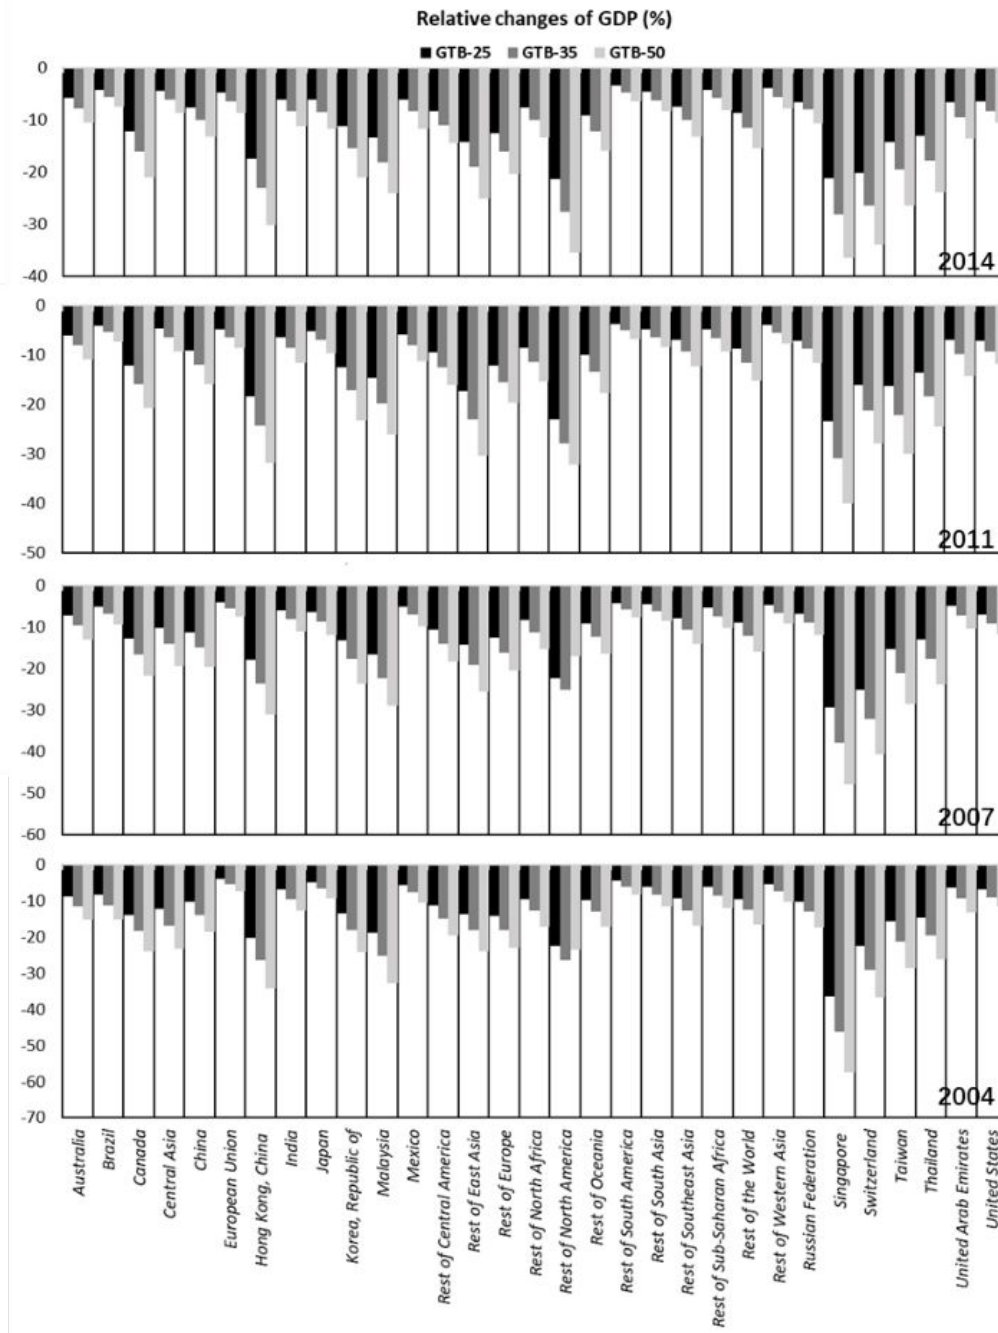

56

57 **Supplementary Figure 1: The relative changes in GDP of individual regions from Actual to each**

58 **scenario under trade restriction series test. Detailed results can be found in the Supplementary Table**

59 2 of this study.

60

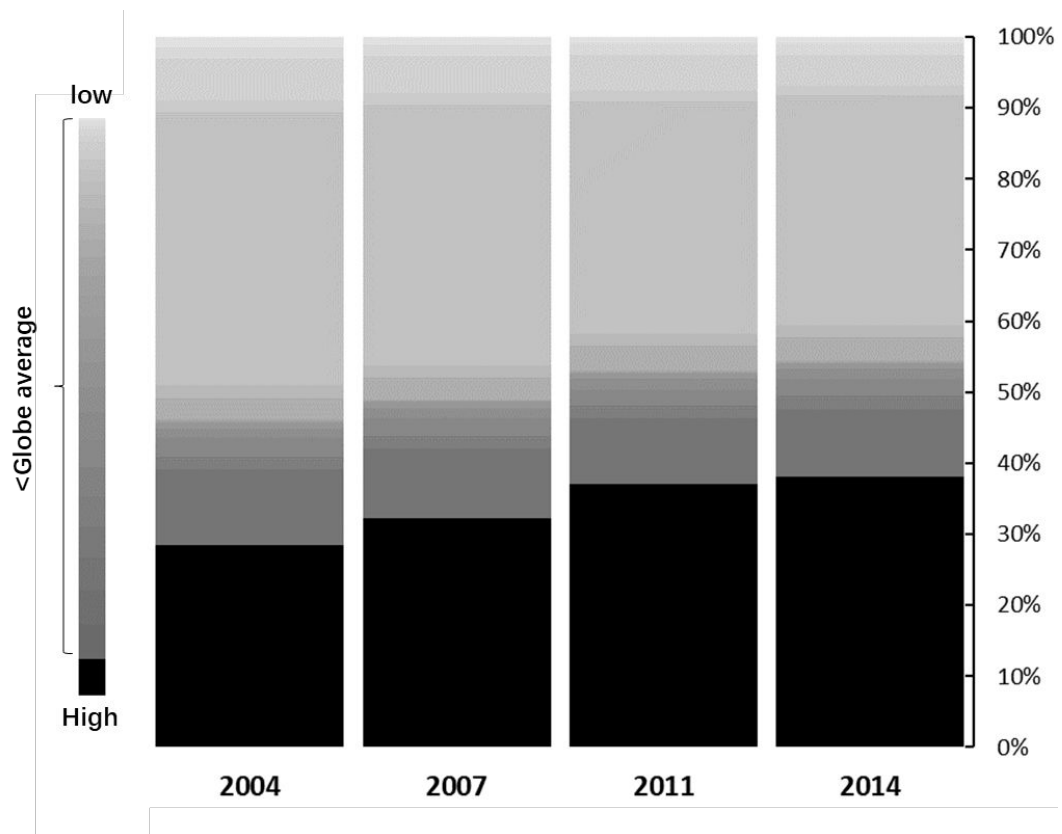

61

62 **Supplementary Figure 2: Increasing share of regions with emission intensity above the global**

63 **average as a percentage (%) of total global trade in this study.** This figure highlights the effects of

64 changes in export structure over time. Each region's share of global exports is shown as a separate

65 stacked bar for each year. Darker colors represent regions with relatively higher emission intensities

66 compared to the global average. The darkest color is the sum of emission-intensive regions, which are

67 defined as regions with emission intensities higher than the global average for each year. Detailed results

68 can be found in the "Export" tab of Supplementary Table 2.

69

70 **References**

71

72 1. Lin, J.; Du, M.; Chen, L.; Feng, K.; Liu, Y.; V. Martin, R.; Wang, J.; Ni, R.; Zhao, Y.; Kong,  
73 H.; Weng, H.; Liu, M.; van Donkelaar, A.; Liu, Q.; Hubacek, K., Carbon and health implications  
74 of trade restrictions. *Nature Communications* **2019**, *10*, (1), 4947.

75 2. Hertwich, E. G., Carbon fueling complex global value chains tripled in the period 1995–  
76 2012. *Energy Economics* **2020**, *86*, 104651.

77 3. Koopman, R.; Wang, Z.; Wei, S.-J., Estimating domestic content in exports when  
78 processing trade is pervasive. *Journal of Development Economics* **2012**, *99*, (1), 178-189.

79
